# Supplementary material for: Chemical characterization of Wuyi rock tea with different roasting degrees and their discrimination based on volatile profiles
Source: PubMed Central journal article supplement — RSC Adv. 2021 Mar 25;11(20):12074–85. doi: 10.1039/d0ra09703a (PMC8696517; doi:10.1039/d0ra09703a), 2021-03-25

Table S1. Roasting conditions for preparing the Wuyi rock tea samples

| Tea sample | Roasting temperature (°C) | Roasting duration (h) |
|------------|---------------------------|-----------------------|
| SX-L       | 120-125                   | 5.0-5.5               |
| SX- M      | 130-135                   | 10.0-10.5             |
| SX-S       | 130-135                   | 14.0-15.0             |
| QZ- L      | 120-125                   | 5.0-5.5               |
| QZ- M      | 130-135                   | 10.0-10.5             |
| QZ- S      | 130-135                   | 14.0-15.0             |
| DHP- L     | 120-125                   | 5-5.5                 |
| DHP- M     | 130-135                   | 10.0-10.5             |
| DHP- S     | 130-135                   | 14.0-15.0             |
| RG- L      | 120-125                   | 5-5.5                 |
| RG- M      | 130-135                   | 10.0-10.5             |
| RG- S      | 130-135                   | 14.0-15.0             |

L, M and S represent low, moderate and sufficient roasting degree, respectively. Samples may be in little different conditions before roasting, which is not easy to control when processing, so the temperature and time may be slightly changed to make it similar with the real practical production.

Table S2. Category and relative content (%) of volatile compounds

| Tea samples | Compound number (relative content, %) |            |                                 |                               |                       |           |           |            |           |          |                   | Total |
|-------------|---------------------------------------|------------|---------------------------------|-------------------------------|-----------------------|-----------|-----------|------------|-----------|----------|-------------------|-------|
|             | Alcohols                              | Esters     | Nitrogen heterocyclic compounds | Oxygen heterocyclic compounds | Aromatic hydrocarbons | Ketones   | Aldehydes | Alkanes    | Olefins   | Acids    | Sulphur compounds |       |
| SX-L        | 15 (23.66)                            | 12 (12.98) | 11 (7.42)                       | 9 (10.34)                     | 7 (8.79)              | 6 (11.94) | 6 (5.95)  | 6 (6.62)   | 3 (8.91)  | 1 (0.53) | 2 (2.83)          | 78    |
| SX-M        | 13 (24.61)                            | 12 (9.90)  | 7 (19.40)                       | 4 (3.99)                      | 7 (16.84)             | 5 (4.43)  | 1 (8.58)  | 4 (4.84)   | 5 (5.44)  | 1 (1.44) | 2 (0.54)          | 61    |
| SX-S        | 14 (21.52)                            | 15 (14.32) | 11 (16.04)                      | 7 (5.39)                      | 6 (11.70)             | 7 (6.68)  | 4 (7.51)  | 5 (6.40)   | 10 (6.63) | 4 (1.05) | 2 (2.77)          | 85    |
| QZ-L        | 22 (31.20)                            | 15 (17.99) | 15 (17.83)                      | 11 (5.72)                     | 5 (4.15)              | 5 (7.59)  | 2 (1.80)  | 4 (4.37)   | 4 (5.05)  | 2 (1.21) | 2 (3.08)          | 87    |
| QZ-M        | 27 (32.47)                            | 13 (21.79) | 10 (10.94)                      | 9 (6.70)                      | 5 (8.57)              | 5 (3.74)  | 3 (3.01)  | 3 (4.02)   | 6 (7.01)  | 1 (0.25) | 2 (1.50)          | 84    |
| QZ-S        | 23 (35.74)                            | 8 (14.29)  | 12 (14.59)                      | 6 (2.83)                      | 6 (10.46)             | 6 (4.14)  | 3 (3.76)  | 5 (6.38)   | 4 (2.41)  | 3 (3.20) | 2 (2.20)          | 78    |
| DHP-L       | 24 (31.38)                            | 12 (19.38) | 8 (9.33)                        | 10 (10.54)                    | 6 (6.47)              | 6 (3.73)  | 3 (4.21)  | 3 (2.76)   | 6 (9.24)  | 2 (1.35) | 2 (1.62)          | 82    |
| DHP-M       | 23 (27.87)                            | 11 (16.98) | 9 (13.21)                       | 7 (8.03)                      | 6 (8.34)              | 5 (1.91)  | 5 (9.59)  | 4 (4.87)   | 6 (6.39)  | 2 (1.04) | 3 (1.77)          | 81    |
| DHP-S       | 18 (19.86)                            | 13 (15.23) | 11 (13.20)                      | 8 (12.45)                     | 6 (9.44)              | 5 (2.66)  | 6 (16.50) | 4 (3.97)   | 5 (3.08)  | 2 (2.16) | 2 (1.44)          | 80    |
| RG-L        | 6 (24.47)                             | 6 (5.62)   | 13 (9.81)                       | 13 (9.38)                     | 10 (8.79)             | 9 (11.47) | 3 (1.71)  | 18 (21.34) | 6 (6.28)  | 1 (0.65) | 1 (0.48)          | 86    |
| RG-M        | 19 (27.34)                            | 15 (13.88) | 8 (11.00)                       | 7 (6.02)                      | 6 (10.40)             | 6 (2.17)  | 1 (0.81)  | 4 (4.65)   | 8 (22.91) | 1 (0.19) | 2 (0.63)          | 77    |
| RG-S        | 21 (27.37)                            | 14 (28.26) | 11 (12.40)                      | 7 (2.96)                      | 9 (9.06)              | 6 (3.07)  | 0 (0)     | 3 (3.46)   | 8 (11.85) | 1 (0.22) | 2 (1.35)          | 82    |

Table S3. Volatile compounds and their relative contents in 12 Wuyi rock tea samples

| Volatile compounds                                                              | N  | Relative content (%) |       |      |      |
|---------------------------------------------------------------------------------|----|----------------------|-------|------|------|
|                                                                                 |    | Min                  | Max   | Mean | SD   |
| Hexanoic acid, 3-hexenyl ester, (Z)-                                            | 12 | 0.63                 | 3.57  | 2.11 | 0.86 |
| Hexanoic acid, hexyl ester                                                      | 12 | 0.72                 | 3.25  | 1.81 | 0.76 |
| 3-Buten-2-one, 4-(2,6,6-trimethyl-1-cyclohexen-1-yl)-                           | 12 | 0.40                 | 6.37  | 1.66 | 1.64 |
| Hexanoic acid, 2-hexenyl ester, (E)-                                            | 12 | 0.33                 | 1.41  | 0.78 | 0.33 |
| 1,6,10-Dodecatrien-3-ol, 3,7,11-trimethyl-                                      | 11 | 2.11                 | 19.14 | 7.66 | 4.97 |
| Hydrazinecarboxylic acid, phenylmethyl ester                                    | 11 | 0.66                 | 6.67  | 3.10 | 1.84 |
| Tetradecane, 2,6,10-trimethyl-                                                  | 11 | 1.50                 | 4.49  | 2.58 | 0.97 |
| Formic acid, 3,7,11-trimethyl-1,6,10-dodecatrien-3-yl ester                     | 11 | 0.28                 | 5.91  | 2.57 | 1.85 |
| 7-Methyl-Z-tetradecen-1-ol acetate                                              | 11 | 0.35                 | 4.91  | 2.17 | 1.35 |
| Limonen-6-ol, pivalate                                                          | 11 | 0.54                 | 4.38  | 1.76 | 1.04 |
| 2-Octen-1-ol, 3,7-dimethyl-, isobutyrate, (Z)-                                  | 11 | 0.23                 | 4.02  | 1.58 | 1.32 |
| Geranyl isovalerate                                                             | 11 | 0.61                 | 3.47  | 1.57 | 0.97 |
| 1,6-Octadien-3-ol, 3,7-dimethyl-                                                | 11 | 0.76                 | 1.58  | 1.04 | 0.28 |
| 4-(2,4,4-Trimethyl-cyclohexa-1,5-dienyl)-but-3-en-2-one                         | 11 | 0.14                 | 2.77  | 0.95 | 0.95 |
| 1-Heptatriacotanol                                                              | 11 | 0.09                 | 2.74  | 0.92 | 0.84 |
| tert-Hexadecanethiol                                                            | 11 | 0.12                 | 1.64  | 0.87 | 0.48 |
| Disulfide, di-tert-dodecyl                                                      | 11 | 0.27                 | 1.94  | 0.86 | 0.58 |
| .alpha.-Farnesene                                                               | 10 | 1.12                 | 6.27  | 3.28 | 1.83 |
| .alpha.-Methyl-.alpha.-[4-methyl-3-pentenyl]oxiranemethanol                     | 10 | 0.33                 | 3.97  | 2.24 | 1.19 |
| 1,2-15,16-Diepoxyhexadecane                                                     | 10 | 0.23                 | 4.74  | 2.21 | 1.49 |
| D-Limonene                                                                      | 10 | 0.52                 | 3.17  | 1.19 | 0.78 |
| Phytol, acetate                                                                 | 10 | 0.15                 | 4.36  | 1.09 | 1.24 |
| Octadecane, 1-chloro-                                                           | 10 | 0.25                 | 1.61  | 0.86 | 0.38 |
| 3-Isopropylidene-5-methyl-hex-4-en-2-one                                        | 10 | 0.23                 | 1.67  | 0.80 | 0.43 |
| 3-Buten-2-one, 4-(2,6,6-trimethyl-2-cyclohexen-1-yl)-                           | 10 | 0.17                 | 1.53  | 0.53 | 0.41 |
| Dodecane, 2-methyl-                                                             | 10 | 0.26                 | 0.45  | 0.36 | 0.06 |
| 7-Oxabicyclo[4.1.0]heptane, 1-methyl-4-(2-methyloxiranyl)-                      | 9  | 0.25                 | 2.14  | 1.11 | 0.76 |
| 2,5-Octadecadiynoic acid, methyl ester                                          | 9  | 0.32                 | 2.33  | 0.88 | 0.64 |
| Naphthalene, 1,2,3,4-tetrahydro-1,6,8-trimethyl-                                | 9  | 0.12                 | 1.13  | 0.77 | 0.28 |
| p-Xylene                                                                        | 8  | 1.16                 | 6.02  | 3.91 | 1.62 |
| 2,5-Dimethylcyclohexanol                                                        | 8  | 2.37                 | 4.33  | 2.99 | 0.68 |
| 1, 1, 5-Trimethyl-1, 2-dihydronaphthalene                                       | 8  | 0.42                 | 3.07  | 2.22 | 0.88 |
| 2(4H)-Benzofuranone, 5,6,7,7a-tetrahydro-4,4,7a-trimethyl-, (R)-                | 8  | 0.71                 | 4.09  | 1.62 | 1.18 |
| 6-Benzyloxy-2,6-dimethyl-octa-2,7-dien-1-ol                                     | 8  | 0.11                 | 1.53  | 0.71 | 0.54 |
| 4-(2,5-Dihydro-3-methoxyphenyl)butylamine                                       | 8  | 0.19                 | 1.26  | 0.71 | 0.38 |
| .alpha.-acorenol                                                                | 8  | 0.18                 | 1.43  | 0.57 | 0.40 |
| Butanoic acid, 2-methyl-, hexyl ester                                           | 8  | 0.23                 | 0.90  | 0.55 | 0.27 |
| Phenol, 4-(ethylamino)-                                                         | 8  | 0.18                 | 1.05  | 0.43 | 0.29 |
| Acetic acid, (1,2,3,4,5,6,7,8-octahydro-3,8,8-trimethylnaphth-2-yl)methyl ester | 8  | 0.21                 | 0.72  | 0.42 | 0.20 |

|                                                                                           |   |      |      |      |      |
|-------------------------------------------------------------------------------------------|---|------|------|------|------|
| Acetamide, N-(4,6,6-trimethylbicyclo[3.1.1]hept-3-en-2-yl)-, (1.alpha.,2.beta.,5.alpha.)- | 8 | 0.11 | 0.61 | 0.41 | 0.20 |
| 4-epi-cubedol                                                                             | 8 | 0.08 | 0.18 | 0.13 | 0.04 |
| (2,2,6-Trimethyl-bicyclo[4.1.0]hept-1-yl)-methanol                                        | 7 | 0.32 | 3.30 | 1.44 | 0.92 |
| Cyclopentanone, 2-cyclopentylidene-                                                       | 7 | 0.17 | 1.18 | 0.58 | 0.44 |
| 1-Methoxyadamantane                                                                       | 7 | 0.37 | 0.76 | 0.57 | 0.13 |
| Undec-10-ynoic acid                                                                       | 7 | 0.22 | 0.57 | 0.37 | 0.15 |
| O-Methylisourea                                                                           | 6 | 0.94 | 5.38 | 2.90 | 1.72 |
| Isopilocarpine                                                                            | 6 | 0.71 | 2.43 | 1.69 | 0.57 |
| Hexanal                                                                                   | 6 | 0.38 | 2.38 | 1.46 | 0.82 |
| Nerolidyl acetate                                                                         | 6 | 0.19 | 2.52 | 1.12 | 0.92 |
| 5-Ethyl-5-methyl-2-phenyl-2-oxazoline                                                     | 6 | 0.30 | 2.57 | 0.99 | 0.86 |
| 2,6-Octadiene-1,8-diol, 2,6-dimethyl-                                                     | 6 | 0.11 | 2.34 | 0.88 | 0.78 |
| 1,1-Cyclohexanedimethanol                                                                 | 6 | 0.08 | 2.16 | 0.72 | 0.74 |
| E-10-Methyl-11-tetradecen-1-ol propionate                                                 | 6 | 0.25 | 1.13 | 0.66 | 0.37 |
| 2-Methyl-4-(2,6,6-trimethylcyclohex-2-enyl)but-3-en-2-ol                                  | 6 | 0.34 | 0.55 | 0.45 | 0.07 |
| 3,7-Octadiene-2,6-diol, 2,6-dimethyl-                                                     | 6 | 0.27 | 0.65 | 0.41 | 0.15 |
| 2-Butyloxycarbonyloxy-1,1,10-trimethyl-6,9-epidioxydecalin                                | 6 | 0.11 | 0.53 | 0.36 | 0.19 |
| 3-Cyclohexen-1-carboxaldehyde, 3,4-dimethyl-                                              | 5 | 2.75 | 8.14 | 4.63 | 2.23 |
| Pentadecane                                                                               | 5 | 0.94 | 5.50 | 2.18 | 1.89 |
| Cyclohexanol, 4-methyl-, trans-                                                           | 5 | 1.04 | 3.05 | 1.99 | 0.86 |
| Terpinyl formate                                                                          | 5 | 1.35 | 2.81 | 1.94 | 0.61 |
| Benzenepropanoic acid, .alpha.-(hydroxyimino)-                                            | 5 | 1.04 | 3.18 | 1.77 | 0.86 |
| cis-.beta.-Farnesene                                                                      | 5 | 0.58 | 2.15 | 1.39 | 0.68 |
| 10-Heptadecen-8-ynoic acid, methyl ester, (E)-                                            | 5 | 0.55 | 0.98 | 0.86 | 0.19 |
| Heptadecane, 2,6,10,15-tetramethyl-                                                       | 5 | 0.38 | 1.47 | 0.85 | 0.40 |
| 10-Undecynoic acid, methyl ester                                                          | 5 | 0.26 | 1.43 | 0.74 | 0.49 |
| Z,Z-2,5-Pentadecadien-1-ol                                                                | 5 | 0.31 | 1.05 | 0.57 | 0.29 |
| Naphthalene, 1,2,3,5,6,8a-hexahydro-4,7-dimethyl-1-(1-methylethyl)-, (1S-cis)-            | 5 | 0.21 | 0.58 | 0.35 | 0.15 |
| 7-epi-cis-sesquisabinene hydrate                                                          | 5 | 0.09 | 0.43 | 0.27 | 0.16 |
| Octahydrobenzo[b]pyran, 4a-acetoxy-5,5,8a-trimethyl-                                      | 5 | 0.12 | 0.35 | 0.20 | 0.10 |
| [5,5-Dimethyl-6-(3-methyl-buta-1,3-dienyl)-7-oxa-bicyclo[4.1.0]hept-1-yl]-methanol        | 5 | 0.09 | 0.28 | 0.18 | 0.08 |
| Octadecanal, 2-bromo-                                                                     | 5 | 0.06 | 0.18 | 0.13 | 0.05 |
| 2,4-Heptadienal, (E,E)-                                                                   | 4 | 0.86 | 5.65 | 2.23 | 2.29 |
| Tricyclo[2.2.1.0(2,6)]heptan-3-ol, 4,5,5-trimethyl-                                       | 4 | 0.44 | 3.32 | 1.96 | 1.44 |
| Benzaldehyde                                                                              | 4 | 0.22 | 3.99 | 1.95 | 1.55 |
| Tricyclo[4.2.2.0(1,5)]decan-7-ol                                                          | 4 | 1.16 | 1.54 | 1.38 | 0.17 |
| Fumaric acid, 2-methylcyclohex-1-enylmethyl pentadecyl ester                              | 4 | 0.67 | 1.83 | 1.30 | 0.53 |
| 3-Decanynoic acid                                                                         | 4 | 0.58 | 1.60 | 1.03 | 0.42 |
| E-2-Hexenyl benzoate                                                                      | 4 | 0.43 | 1.43 | 1.02 | 0.48 |
| Benzaldehyde, 3-benzyloxy-2-fluoro-4-methoxy-                                             | 4 | 0.12 | 2.81 | 0.95 | 1.25 |
| 1,5,5-Trimethyl-6-methylene-cyclohexene                                                   | 4 | 0.11 | 2.01 | 0.89 | 0.83 |

|                                                                                                                                   |   |      |      |      |      |
|-----------------------------------------------------------------------------------------------------------------------------------|---|------|------|------|------|
| cis-3-Hexenyl-.alpha.-methylbutyrate                                                                                              | 4 | 0.53 | 0.88 | 0.73 | 0.17 |
| Ethinamate                                                                                                                        | 4 | 0.16 | 1.42 | 0.72 | 0.64 |
| N-[3-[N-Aziridyl]propylidene]tetrahydrofurfurylamine                                                                              | 4 | 0.51 | 0.90 | 0.70 | 0.18 |
| 2-Ethylbutyric acid, eicosyl ester                                                                                                | 4 | 0.40 | 0.73 | 0.58 | 0.15 |
| Z,Z,Z-1,4,6,9-Nonadecatetraene                                                                                                    | 4 | 0.51 | 0.63 | 0.57 | 0.06 |
| Piperazine, 1-methyl-4-[2-(p-tolylsulfonyl)ethyl]-                                                                                | 4 | 0.22 | 0.66 | 0.45 | 0.21 |
| trans-Farnesol                                                                                                                    | 4 | 0.20 | 0.41 | 0.33 | 0.09 |
| 2-Pentadecanone, 6,10,14-trimethyl-                                                                                               | 4 | 0.12 | 0.30 | 0.23 | 0.08 |
| 2,4-Nonadienal, (E,E)-                                                                                                            | 3 | 2.24 | 5.35 | 3.28 | 1.79 |
| Cyclohexan-1,4,5-triol-3-one-1-carboxylic acid                                                                                    | 3 | 0.59 | 5.59 | 2.31 | 2.85 |
| 2,2,2-Trifluoro-N-[2-(1-hydroxy-2,2,6,6-tetramethyl-piperidin-4-yl)-ethyl]-acetamide                                              | 3 | 0.13 | 3.99 | 1.86 | 1.96 |
| Mesitylene                                                                                                                        | 3 | 1.16 | 2.07 | 1.56 | 0.46 |
| Heptane, 1-nitro-                                                                                                                 | 3 | 1.04 | 1.81 | 1.52 | 0.42 |
| 1,2-Propanediol diformate                                                                                                         | 3 | 0.82 | 1.40 | 1.20 | 0.33 |
| 2H-Pyran-3-ol, 6-ethenyltetrahydro-2,2,6-trimethyl-                                                                               | 3 | 0.61 | 1.46 | 1.15 | 0.47 |
| Bicyclo[3.1.1]hept-2-en-4-ol, 2,6,6-trimethyl-, acetate                                                                           | 3 | 0.61 | 1.37 | 1.10 | 0.43 |
| Cyclohexene, 1-(2-nitro-2-propenyl)-                                                                                              | 3 | 0.58 | 1.40 | 1.04 | 0.42 |
| 1-Cyclohexene-1-carboxaldehyde, 2,6,6-trimethyl-                                                                                  | 3 | 0.61 | 1.42 | 1.01 | 0.41 |
| 5-Amino-1-benzoyl-1H-pyrazole-3,4-dicarbonitrile                                                                                  | 3 | 0.24 | 1.18 | 0.86 | 0.54 |
| Imidazole, 4-methyl-5-[2-methyl-2-propenyl]-                                                                                      | 3 | 0.57 | 1.08 | 0.79 | 0.26 |
| Naphthalene, 1,2,3,4-tetrahydro-1,5,8-trimethyl-                                                                                  | 3 | 0.65 | 0.87 | 0.78 | 0.11 |
| R-Limonene                                                                                                                        | 3 | 0.20 | 1.13 | 0.61 | 0.47 |
| (9-Oxabicyclo[3.3.1]non-6-en-3-yl)methanol                                                                                        | 3 | 0.40 | 0.74 | 0.58 | 0.17 |
| Nona-3,5-dien-2-ol                                                                                                                | 3 | 0.43 | 0.81 | 0.57 | 0.20 |
| Cyclopentasiloxane, decamethyl-                                                                                                   | 3 | 0.48 | 0.62 | 0.55 | 0.07 |
| 3,7-Cycloundecadien-1-ol, 1,5,5,8-tetramethyl-                                                                                    | 3 | 0.41 | 0.56 | 0.47 | 0.07 |
| 17-Octadecynoic acid                                                                                                              | 3 | 0.08 | 0.93 | 0.47 | 0.43 |
| (-)-Myrtenol                                                                                                                      | 3 | 0.32 | 0.57 | 0.42 | 0.13 |
| Ethanone, 1-(1-hydroxy-2,6,6-trimethyl-2,4-cyclohexadien-1-yl)-                                                                   | 3 | 0.40 | 0.44 | 0.42 | 0.02 |
| 1H-3a,7-Methanoazulene, 2,3,4,7,8,8a-hexahydro-3,6,8,8-tetramethyl-, [3R-(3.alpha.,3a.beta.,7.beta.,8a.alpha.)]-                  | 3 | 0.35 | 0.51 | 0.42 | 0.08 |
| Heptacosane                                                                                                                       | 3 | 0.10 | 0.72 | 0.31 | 0.35 |
| 5-Hydroxymethyl-1,1,4a-trimethyl-6-methylenedecahydronaphthalen-2-ol                                                              | 3 | 0.09 | 0.48 | 0.29 | 0.20 |
| 10-Hydroxy-2,4a,6a,6b,9,9,12a-heptamethyl-1,2,3,4,4a,5,6,6a,6b,7,8,8a,9,10,11,12,12a,12b,13,14b-eicosahydricene-2-carboxylic acid | 3 | 0.10 | 0.35 | 0.24 | 0.13 |
| N-Benzyl-2-aminocinnamate, methyl ester                                                                                           | 3 | 0.16 | 0.23 | 0.20 | 0.03 |
| Oct-3-ene-1,5-diyne, 3-t-butyl-7,7-dimethyl-                                                                                      | 3 | 0.12 | 0.25 | 0.19 | 0.06 |
| Cedrol                                                                                                                            | 3 | 0.14 | 0.24 | 0.18 | 0.05 |
| Phenol, 2,4,6-tris(1,1-dimethylethyl)-                                                                                            | 3 | 0.12 | 0.14 | 0.13 | 0.01 |
| 3-Buten-2-ol, 3-methyl-4-(2,6,6-trimethyl-2-cyclohexen-1-yl)-                                                                     | 3 | 0.10 | 0.13 | 0.11 | 0.02 |
| Bromoacetic acid, 2-ethylcyclohexyl ester                                                                                         | 2 | 2.24 | 5.01 | 3.63 | 1.96 |

|                                                                                                                                                 |   |      |      |      |      |
|-------------------------------------------------------------------------------------------------------------------------------------------------|---|------|------|------|------|
| 2,6,10-Dodecatrien-1-ol, 3,7,11-trimethyl-                                                                                                      | 2 | 2.16 | 4.02 | 3.09 | 1.32 |
| 2-Oxabicyclo[2.2.2]octan-6-ol, 1,3,3-trimethyl-, acetate                                                                                        | 2 | 2.01 | 4.10 | 3.05 | 1.47 |
| 2,2-Difluoroethanol, tert-butyldimethylsilyl ether                                                                                              | 2 | 2.44 | 3.00 | 2.72 | 0.40 |
| 2,7-Octadiene-1,6-diol, 2,6-dimethyl-                                                                                                           | 2 | 2.27 | 3.05 | 2.66 | 0.56 |
| 3-Carene                                                                                                                                        | 2 | 1.56 | 2.90 | 2.23 | 0.95 |
| Phenol, 4-amino-3-methyl-                                                                                                                       | 2 | 1.22 | 2.83 | 2.02 | 1.14 |
| Naphthalene, 1,2-dihydro-1,1,6-trimethyl-                                                                                                       | 2 | 1.58 | 1.59 | 1.59 | 0.00 |
| 1H-Pyrrole, 2-ethyl-                                                                                                                            | 2 | 1.45 | 1.60 | 1.52 | 0.10 |
| 1-(4-tert-Butylphenyl)propan-2-one                                                                                                              | 2 | 1.45 | 1.53 | 1.49 | 0.06 |
| Naphthalene, 1,2-dihydro-1,5,8-trimethyl-                                                                                                       | 2 | 1.00 | 1.78 | 1.39 | 0.55 |
| Acetic acid, 1,3,7-trimethylocta-2,6-dienyl ester                                                                                               | 2 | 0.94 | 1.48 | 1.21 | 0.38 |
| Pyrazine, 2-ethyl-3,5-dimethyl-                                                                                                                 | 2 | 0.99 | 1.38 | 1.18 | 0.27 |
| Caryophyllene                                                                                                                                   | 2 | 1.12 | 1.16 | 1.14 | 0.03 |
| 7-Propylidene-bicyclo[4.1.0]heptane                                                                                                             | 2 | 0.84 | 1.34 | 1.09 | 0.36 |
| 8-Decen-2-one, 9-methyl-5-methylene-                                                                                                            | 2 | 0.62 | 1.19 | 0.90 | 0.40 |
| 2H-Pyran-2,5-diol, tetrahydro-, diacetate                                                                                                       | 2 | 0.72 | 0.95 | 0.84 | 0.17 |
| Cyclohexanone, 2,2,6-trimethyl-                                                                                                                 | 2 | 0.46 | 1.01 | 0.74 | 0.39 |
| 3-(1,5-Dimethyl-hex-4-enyl)-2,2-dimethyl-cyclopent-3-enol                                                                                       | 2 | 0.49 | 0.85 | 0.67 | 0.26 |
| 2,5-Pyrrolidinedione, 1-ethyl-                                                                                                                  | 2 | 0.37 | 0.53 | 0.45 | 0.11 |
| 1-Penten-3-one, 1-(2,6,6-trimethyl-1-cyclohexen-1-yl)-                                                                                          | 2 | 0.36 | 0.51 | 0.44 | 0.11 |
| Carveol                                                                                                                                         | 2 | 0.40 | 0.45 | 0.43 | 0.04 |
| Acetic acid, 10,11-dihydroxy-3,7,11-trimethyl-dodeca-2,6-dienyl ester                                                                           | 2 | 0.30 | 0.34 | 0.32 | 0.03 |
| 2,4-Heptadienal, 2,4-dimethyl-                                                                                                                  | 2 | 0.20 | 0.38 | 0.29 | 0.13 |
| (3-Fluorophenyl) methanol, 3-methylbutyl ether                                                                                                  | 2 | 0.24 | 0.32 | 0.28 | 0.06 |
| Bicyclo[4.4.0]dec-1-ene, 2-isopropyl-5-methyl-9-methylene-                                                                                      | 2 | 0.15 | 0.36 | 0.25 | 0.15 |
| Ethyl iso-allocholate                                                                                                                           | 2 | 0.24 | 0.26 | 0.25 | 0.02 |
| 1H-3a,7-Methanoazulene, octahydro-3,8,8-trimethyl-6-methylene-, [3R-(3.alpha.,3a.beta.,7.beta.,8a.alpha.)]-                                     | 2 | 0.18 | 0.30 | 0.24 | 0.08 |
| Hexadecanoic acid, methyl ester                                                                                                                 | 2 | 0.19 | 0.29 | 0.24 | 0.07 |
| 2,4-Di-t-butyladamantane-2,4-diol                                                                                                               | 2 | 0.21 | 0.24 | 0.23 | 0.02 |
| 1b,4a-Epoxy-2H-cyclopenta[3,4]cyclopropa[8,9]cycloundec[1,2-b]oxiren-5(1aH)-one, 2,7,9,10-tetrakis(acetyloxy)decahydro-3,6,8,8,10a-pentamethyl- | 2 | 0.09 | 0.32 | 0.21 | 0.17 |
| Pentadecanoic acid, 13-methyl-, methyl ester                                                                                                    | 2 | 0.17 | 0.20 | 0.19 | 0.02 |
| Butanoic acid, 3-methyl-, 2-hexenyl ester, (E)-                                                                                                 | 2 | 0.12 | 0.20 | 0.16 | 0.06 |
| Bicyclo[3.1.0]hexan-2-ol, acetate, (1.alpha.,2.beta.,5.alpha.)-                                                                                 | 2 | 0.11 | 0.19 | 0.15 | 0.06 |
| 6-epi-shyobunol                                                                                                                                 | 2 | 0.14 | 0.14 | 0.14 | 0.00 |
| Propanoic acid, 2-(3-acetoxy-4,4,14-trimethylandro-8-en-17-yl)-                                                                                 | 2 | 0.10 | 0.17 | 0.14 | 0.05 |
| Cedrane, 8-propoxy-                                                                                                                             | 2 | 0.11 | 0.12 | 0.12 | 0.00 |
| E-2-Methyl-3-tetradecen-1-ol acetate                                                                                                            | 2 | 0.07 | 0.15 | 0.11 | 0.05 |
| Cyclopropanebutanoic acid, 2-[[2-[[2-[(2-pentylcyclopropyl)methyl]cyclopropyl]methyl]cyclopropyl]methyl]-, methyl ester                         | 2 | 0.09 | 0.12 | 0.11 | 0.02 |
| Tetrapentacontane, 1,54-dibromo-                                                                                                                | 2 | 0.10 | 0.11 | 0.10 | 0.00 |

|                                                                                  |   |      |      |      |      |
|----------------------------------------------------------------------------------|---|------|------|------|------|
| 10-Methyl-8-tetradecen-1-ol acetate                                              | 2 | 0.06 | 0.13 | 0.09 | 0.05 |
| o-Xylene                                                                         | 1 | 9.86 | 9.86 | 9.86 | /    |
| 1-Bromo-3,7-dimethyl-2,6-octadiene                                               | 1 | 6.64 | 6.64 | 6.64 | /    |
| 1,3-Hexadiene, 3-ethyl-2-methyl-, (Z)-                                           | 1 | 4.95 | 4.95 | 4.95 | /    |
| Hexadecane, 2,6,11,15-tetramethyl-                                               | 1 | 3.16 | 3.16 | 3.16 | /    |
| 6-(3,5-Dimethyl-1H-pyrazol-1-yl)-N-benzyl-1,2,4,5-tetrazine-3-amine              | 1 | 3.01 | 3.01 | 3.01 | /    |
| cis-Verbenol                                                                     | 1 | 2.79 | 2.79 | 2.79 | /    |
| Benzyl nitrile                                                                   | 1 | 2.68 | 2.68 | 2.68 | /    |
| trans-.beta.-Ionone                                                              | 1 | 2.67 | 2.67 | 2.67 | /    |
| Tributyl phosphate                                                               | 1 | 2.63 | 2.63 | 2.63 | /    |
| trans-8-Isopropylbicyclo[4.3.0]non-3-ene                                         | 1 | 2.41 | 2.41 | 2.41 | /    |
| 1,2-Dihydrothujopsene-(I1)                                                       | 1 | 2.21 | 2.21 | 2.21 | /    |
| 4-(2,6,6-Trimethylcyclohexa-1,3-dienyl)but-3-en-2-one                            | 1 | 2.19 | 2.19 | 2.19 | /    |
| 1,5,7-Octatrien-3-ol, 3,7-dimethyl-                                              | 1 | 2.16 | 2.16 | 2.16 | /    |
| Octanoic acid, 3-phenyl-2-propenyl ester                                         | 1 | 2.06 | 2.06 | 2.06 | /    |
| Benzene, [[[1-ethenyl-1,5-dimethyl-4-hexenyl)oxy]methyl]-                        | 1 | 2.05 | 2.05 | 2.05 | /    |
| Oxirane, decyl-                                                                  | 1 | 2.03 | 2.03 | 2.03 | /    |
| Hexadecane                                                                       | 1 | 2.01 | 2.01 | 2.01 | /    |
| Linalyl acetate                                                                  | 1 | 2.00 | 2.00 | 2.00 | /    |
| 1,4-Benzenediamine                                                               | 1 | 1.96 | 1.96 | 1.96 | /    |
| Ethyl 2-(5-methyl-5-vinyltetrahydrofuran-2-yl)propan-2-yl carbonate              | 1 | 1.88 | 1.88 | 1.88 | /    |
| 2,6,10-Trimethyltridecane                                                        | 1 | 1.85 | 1.85 | 1.85 | /    |
| Decanoic acid, ethyl ester                                                       | 1 | 1.83 | 1.83 | 1.83 | /    |
| N-Methoxy-1-ribofuranosyl-4-imidazolecarboxylic amide                            | 1 | 1.79 | 1.79 | 1.79 | /    |
| Benzene, 1,2-diethyl-                                                            | 1 | 1.78 | 1.78 | 1.78 | /    |
| Bicyclo[2.2.1]heptane, 7,7-dimethyl-2-methylene-                                 | 1 | 1.77 | 1.77 | 1.77 | /    |
| 2-Hydroxy-2-(5-methylfuran-2-yl)1-phenylethanone                                 | 1 | 1.75 | 1.75 | 1.75 | /    |
| Tetraacetyl-d-xylonic nitrile                                                    | 1 | 1.73 | 1.73 | 1.73 | /    |
| 1,5,9-Cyclododecanetriol                                                         | 1 | 1.67 | 1.67 | 1.67 | /    |
| Nonane, 3-methyl-5-propyl-                                                       | 1 | 1.54 | 1.54 | 1.54 | /    |
| Geranyl vinyl ether                                                              | 1 | 1.49 | 1.49 | 1.49 | /    |
| Menthol, 1'-(butyn-3-one-1-yl)-, (1R,2S,5R)-                                     | 1 | 1.44 | 1.44 | 1.44 | /    |
| 2-Isopropyl-5-methyl-1-heptanol                                                  | 1 | 1.42 | 1.42 | 1.42 | /    |
| Cyclohexanol, 2-methyl-5-(1-methylethenyl)-                                      | 1 | 1.36 | 1.36 | 1.36 | /    |
| 4-Amino-2,3-xyleneol                                                             | 1 | 1.32 | 1.32 | 1.32 | /    |
| Nonyl tetradecyl ether                                                           | 1 | 1.22 | 1.22 | 1.22 | /    |
| Pentadioic acid, dihydrazide, N2,N2'-bis(2-furfurylideno)-                       | 1 | 1.21 | 1.21 | 1.21 | /    |
| (3R,6S)-2,2,6-Trimethyl-6-vinyltetrahydro-2H-pyran-3-ol                          | 1 | 1.19 | 1.19 | 1.19 | /    |
| 2-Nonen-1-ol                                                                     | 1 | 1.16 | 1.16 | 1.16 | /    |
| 1H-Benzocyclohepten-7-ol, 2,3,4,4a,5,6,7,8-octahydro-1,1,4a,7-tetramethyl-, cis- | 1 | 1.15 | 1.15 | 1.15 | /    |
| 5-Hepten-2-one, 6-methyl-                                                        | 1 | 1.07 | 1.07 | 1.07 | /    |
| sec-Butyl nitrite                                                                | 1 | 1.00 | 1.00 | 1.00 | /    |
| Linalool                                                                         | 1 | 0.99 | 0.99 | 0.99 | /    |

|                                                                                                                  |   |      |      |      |   |
|------------------------------------------------------------------------------------------------------------------|---|------|------|------|---|
| (1R)-2,6,6-Trimethylbicyclo[3.1.1]hept-2-ene                                                                     | 1 | 0.99 | 0.99 | 0.99 | / |
| 1-Propanone, 1-(1-adamantyl)-3-dimethylamino-                                                                    | 1 | 0.94 | 0.94 | 0.94 | / |
| Toluene                                                                                                          | 1 | 0.93 | 0.93 | 0.93 | / |
| 2-Decen-1-ol, (E)-                                                                                               | 1 | 0.92 | 0.92 | 0.92 | / |
| .alpha.-Ionone                                                                                                   | 1 | 0.91 | 0.91 | 0.91 | / |
| .gamma.-Chlorobutyrophenone                                                                                      | 1 | 0.90 | 0.90 | 0.90 | / |
| 2-Benzoyloxy-1,1,10-trimethyl-6,9-epidioxydecalin                                                                | 1 | 0.89 | 0.89 | 0.89 | / |
| 10-Methyl-E-11-tridecen-1-ol propionate                                                                          | 1 | 0.89 | 0.89 | 0.89 | / |
| Ethanone, 1-(1H-pyrrol-2-yl)-                                                                                    | 1 | 0.87 | 0.87 | 0.87 | / |
| 3-(O-Anisidinomethyl)-5-(3-fluorobenzylidene)-2,4-thiazolidinedione                                              | 1 | 0.85 | 0.85 | 0.85 | / |
| Bicyclo[4.1.0]hepta-1,3,5-triene                                                                                 | 1 | 0.85 | 0.85 | 0.85 | / |
| Imidazo[4,5-d]imidazole, 1,6-dihydro-                                                                            | 1 | 0.78 | 0.78 | 0.78 | / |
| 3-Formyl-4,5-dimethyl-pyrrole                                                                                    | 1 | 0.76 | 0.76 | 0.76 | / |
| Spiro[2,4]hepta-4,6-diene                                                                                        | 1 | 0.76 | 0.76 | 0.76 | / |
| Benzenemethanol, 3-amino-                                                                                        | 1 | 0.76 | 0.76 | 0.76 | / |
| 3,5-Heptadienal, 2-ethylidene-6-methyl-                                                                          | 1 | 0.75 | 0.75 | 0.75 | / |
| 3-Furaldehyde                                                                                                    | 1 | 0.73 | 0.73 | 0.73 | / |
| 2-Hepten-1-ol, (E)-                                                                                              | 1 | 0.72 | 0.72 | 0.72 | / |
| Pyrazine, 2-ethyl-6-methyl-                                                                                      | 1 | 0.69 | 0.69 | 0.69 | / |
| Nonane, 4,5-dimethyl-                                                                                            | 1 | 0.69 | 0.69 | 0.69 | / |
| Furan, 2-propyl-                                                                                                 | 1 | 0.68 | 0.68 | 0.68 | / |
| 3-Pentanone                                                                                                      | 1 | 0.68 | 0.68 | 0.68 | / |
| Heptadecane, 2-methyl-                                                                                           | 1 | 0.67 | 0.67 | 0.67 | / |
| 5,9-Undecadien-2-one, 6,10-dimethyl-, (E)-                                                                       | 1 | 0.66 | 0.66 | 0.66 | / |
| 1-Propanone, 1-(2-furanyl)-                                                                                      | 1 | 0.65 | 0.65 | 0.65 | / |
| Propanoic acid, anhydride                                                                                        | 1 | 0.65 | 0.65 | 0.65 | / |
| Neophytadiene                                                                                                    | 1 | 0.65 | 0.65 | 0.65 | / |
| 1-(4-Methoxyphenyl)propane-1,2-diol                                                                              | 1 | 0.64 | 0.64 | 0.64 | / |
| 5,9-Undecadien-2-one, 6,10-dimethyl-, (Z)-                                                                       | 1 | 0.63 | 0.63 | 0.63 | / |
| Nonane, 5-butyl-                                                                                                 | 1 | 0.61 | 0.61 | 0.61 | / |
| Nonane, 2,2,4,4,6,8,8-heptamethyl-                                                                               | 1 | 0.57 | 0.57 | 0.57 | / |
| 2H-Pyran, tetrahydro-2-(12-pentadecyloxy)-                                                                       | 1 | 0.55 | 0.55 | 0.55 | / |
| 11-Methyldodecanol                                                                                               | 1 | 0.55 | 0.55 | 0.55 | / |
| Methoxyacetic acid, pentyl ester                                                                                 | 1 | 0.54 | 0.54 | 0.54 | / |
| 1,7-Octadien-3-ol, 3,7-dimethyl-                                                                                 | 1 | 0.53 | 0.53 | 0.53 | / |
| 1-Decanol, 2-hexyl-                                                                                              | 1 | 0.52 | 0.52 | 0.52 | / |
| 2-Furancarboxaldehyde, 5-methyl-                                                                                 | 1 | 0.52 | 0.52 | 0.52 | / |
| 3-Acetyl-N-methyl-tomatidine                                                                                     | 1 | 0.52 | 0.52 | 0.52 | / |
| Furan, 2-ethyl-5-methyl-                                                                                         | 1 | 0.51 | 0.51 | 0.51 | / |
| 2-Adamantanol, 4-bromo-                                                                                          | 1 | 0.51 | 0.51 | 0.51 | / |
| 2H-Benzo[f]oxireno[2,3-E]benzofuran-8(9H)-one, 9-[[[2-(dimethylamino)ethyl]amino]methyl]octahydro-2,5a-dimethyl- | 1 | 0.51 | 0.51 | 0.51 | / |
| Pyrazine, trimethyl-                                                                                             | 1 | 0.50 | 0.50 | 0.50 | / |
| 1-Hexadecanol, 2-methyl-                                                                                         | 1 | 0.50 | 0.50 | 0.50 | / |



|                                                                                               |   |      |      |      |   |
|-----------------------------------------------------------------------------------------------|---|------|------|------|---|
| Decane-1-sulfonic acid (4-methoxy-phenyl)-amide                                               | 1 | 0.48 | 0.48 | 0.48 | / |
| 8-Tetradecyn-1-ol acetate                                                                     | 1 | 0.48 | 0.48 | 0.48 | / |
| 3-Benzoyl-perhydro-2-oxofuran                                                                 | 1 | 0.47 | 0.47 | 0.47 | / |
| Undecane, 3,8-dimethyl-                                                                       | 1 | 0.45 | 0.45 | 0.45 | / |
| p-Cymene                                                                                      | 1 | 0.45 | 0.45 | 0.45 | / |
| 1H-Imidazole-4-ethanamine, .beta.-methyl-                                                     | 1 | 0.45 | 0.45 | 0.45 | / |
| Pentanoic acid, heptadecyl ester                                                              | 1 | 0.45 | 0.45 | 0.45 | / |
| 2,4,6-Trimethyl-1,3-phenylenediamine                                                          | 1 | 0.45 | 0.45 | 0.45 | / |
| 2,4-Difluorobenzene, 1-benzyloxy-                                                             | 1 | 0.44 | 0.44 | 0.44 | / |
| 1-Pentyne, 3-ethoxy-3-ethyl-                                                                  | 1 | 0.43 | 0.43 | 0.43 | / |
| 2-Bromo dodecane                                                                              | 1 | 0.43 | 0.43 | 0.43 | / |
| trans-Linalool oxide (furanoid)                                                               | 1 | 0.42 | 0.42 | 0.42 | / |
| 6-Amino-2,4-dimethylphenol                                                                    | 1 | 0.41 | 0.41 | 0.41 | / |
| E-6-Tetradecen-1-ol acetate                                                                   | 1 | 0.41 | 0.41 | 0.41 | / |
| 2-Furanmethanol, 5-ethenyltetrahydro-.alpha.,.alpha.,5-trimethyl-,<br>cis-                    | 1 | 0.40 | 0.40 | 0.40 | / |
| Cyclohexene, 3-(1-methylethyl)-                                                               | 1 | 0.40 | 0.40 | 0.40 | / |
| Tricyclo[5.3.0.0(2,6)]deca-3,10-dione, 6,7-dichloro-                                          | 1 | 0.40 | 0.40 | 0.40 | / |
| Heneicosane                                                                                   | 1 | 0.40 | 0.40 | 0.40 | / |
| 4-Acetyl-1H-pyrroline-2-carbaldehyde                                                          | 1 | 0.39 | 0.39 | 0.39 | / |
| Hexadecane, 2,6,10,14-tetramethyl-                                                            | 1 | 0.39 | 0.39 | 0.39 | / |
| 1-Octanesulfonyl chloride                                                                     | 1 | 0.39 | 0.39 | 0.39 | / |
| 1,3,7-Octatriene, 2,7-dimethyl-                                                               | 1 | 0.39 | 0.39 | 0.39 | / |
| 6,6-Dimethyl-10-methylene-1-oxa-spiro[4.5]decane                                              | 1 | 0.38 | 0.38 | 0.38 | / |
| 2-Pentadecen-4-yne, (Z)-                                                                      | 1 | 0.38 | 0.38 | 0.38 | / |
| Benzeneacetaldehyde                                                                           | 1 | 0.38 | 0.38 | 0.38 | / |
| 6-Methyl-6-nitroheptan-2-one                                                                  | 1 | 0.37 | 0.37 | 0.37 | / |
| Geranyl angelate                                                                              | 1 | 0.37 | 0.37 | 0.37 | / |
| 2-Propanone, 1,1,1-trifluoro-                                                                 | 1 | 0.37 | 0.37 | 0.37 | / |
| 3,5-Dimethyl-4-allylpyrazole                                                                  | 1 | 0.37 | 0.37 | 0.37 | / |
| Ethanone, 1-(2-furanyl)-                                                                      | 1 | 0.36 | 0.36 | 0.36 | / |
| Pyrazine, 2-ethyl-3-methyl-                                                                   | 1 | 0.36 | 0.36 | 0.36 | / |
| (-)-Spathulenol                                                                               | 1 | 0.34 | 0.34 | 0.34 | / |
| Octanoic acid, 7-oxo-                                                                         | 1 | 0.33 | 0.33 | 0.33 | / |
| 1,2-Cyclopentanediol, 3-methyl-                                                               | 1 | 0.33 | 0.33 | 0.33 | / |
| 3-Ethyl-3-methylheptane                                                                       | 1 | 0.32 | 0.32 | 0.32 | / |
| Tetradecane                                                                                   | 1 | 0.31 | 0.31 | 0.31 | / |
| 3-t-Butyl-oct-6-en-1-ol                                                                       | 1 | 0.31 | 0.31 | 0.31 | / |
| 1-Cyclopropene-1-pentanol, .alpha.,.epsilon.,.epsilon.,2-tetramethyl-<br>3-(1-methylethenyl)- | 1 | 0.30 | 0.30 | 0.30 | / |
| 1,8-Nonadien-3-ol                                                                             | 1 | 0.30 | 0.30 | 0.30 | / |
| 1,4-dihydroxy-p-menth-2-ene                                                                   | 1 | 0.27 | 0.27 | 0.27 | / |
| Phenol, 2,4,6-tri-tert-butyl-                                                                 | 1 | 0.27 | 0.27 | 0.27 | / |
| 2,4-Dimethyldodecane                                                                          | 1 | 0.27 | 0.27 | 0.27 | / |

|                                                                                                              |   |      |      |      |   |
|--------------------------------------------------------------------------------------------------------------|---|------|------|------|---|
| Bicyclo[2.2.1]heptan-2-ol, 7,7-dimethyl-, acetate                                                            | 1 | 0.26 | 0.26 | 0.26 | / |
| 5-Hexadecenoic acid, 2-methoxy-, methyl ester                                                                | 1 | 0.26 | 0.26 | 0.26 | / |
| Octanal                                                                                                      | 1 | 0.24 | 0.24 | 0.24 | / |
| Pyrazine, 3-ethyl-2,5-dimethyl-                                                                              | 1 | 0.24 | 0.24 | 0.24 | / |
| 4-(2,2-Dimethyl-6-methylenecyclohexyl)butanal                                                                | 1 | 0.21 | 0.21 | 0.21 | / |
| 3-Methoxymethoxy-6,6-dimethyl-2-methylene-bicyclo[3.1.1]heptane                                              | 1 | 0.21 | 0.21 | 0.21 | / |
| 1H-3a,7-Methanoazulene, 2,3,6,7,8,8a-hexahydro-1,4,9,9-tetramethyl-, (1.alpha.,3a.alpha.,7.alpha.,8a.beta.)- | 1 | 0.20 | 0.20 | 0.20 | / |
| Phenol, 2,6-bis(1,1-dimethylethyl)-4-(1-methylpropyl)-                                                       | 1 | 0.19 | 0.19 | 0.19 | / |
| 3-(Benzyloxymethyl)hex-5-ene-1,2-diol                                                                        | 1 | 0.18 | 0.18 | 0.18 | / |
| 1,4-Methanoazulen-3-ol, decahydro-1,5,5,8a-tetramethyl-, [1S-(1.alpha.,3.beta.,3a.beta.,4.alpha.,8a.beta.)]- | 1 | 0.18 | 0.18 | 0.18 | / |
| Octadecane, 3-ethyl-5-(2-ethylbutyl)-                                                                        | 1 | 0.17 | 0.17 | 0.17 | / |
| 2-Naphthol, 1,2,3,4,4a,5,6,7-octahydro-4a-methyl-                                                            | 1 | 0.15 | 0.15 | 0.15 | / |
| 1,4-Methanoazulen-7-ol, decahydro-1,5,5,8a-tetramethyl-, [1S-(1.alpha.,3a.beta.,4.alpha.,7.beta.,8a.beta.)]- | 1 | 0.14 | 0.14 | 0.14 | / |
| Falcarinol                                                                                                   | 1 | 0.14 | 0.14 | 0.14 | / |
| (1H)Imidazol-4-amine, 2,5-diisobutyl-                                                                        | 1 | 0.13 | 0.13 | 0.13 | / |
| 2-Naphthalenamine, 1,2,3,4-tetrahydro-N-methyl-1-(2-methyl-1-propenyl)-, trans-                              | 1 | 0.13 | 0.13 | 0.13 | / |
| 3-Cyclopentylpropionic acid, 2-isopropoxyphenyl ester                                                        | 1 | 0.12 | 0.12 | 0.12 | / |
| Nona-2,3-dienoic acid, ethyl ester                                                                           | 1 | 0.12 | 0.12 | 0.12 | / |
| 2-(2-Methyl-propenyl)-cyclohexanone oxime                                                                    | 1 | 0.12 | 0.12 | 0.12 | / |
| Acetic acid, 1,7,7-trimethyl-bicyclo[2.2.1]hept-2-yl ester                                                   | 1 | 0.12 | 0.12 | 0.12 | / |
| 2,5,5,8a-Tetramethyl-4-methylene-6,7,8,8a-tetrahydro-4H,5H-chromen-4a-yl hydroperoxide                       | 1 | 0.12 | 0.12 | 0.12 | / |
| beta.-Guaiene                                                                                                | 1 | 0.11 | 0.11 | 0.11 | / |
| 2-[4-methyl-6-(2,6,6-trimethylcyclohex-1-enyl)hexa-1,3,5-trienyl]cyclohex-1-en-1-carboxaldehyde              | 1 | 0.11 | 0.11 | 0.11 | / |
| 1,3-Dioxane, 5-(hexadecyloxy)-2-pentadecyl-, trans-                                                          | 1 | 0.11 | 0.11 | 0.11 | / |
| Acetamide, N-methyl-N-[4-(3-hydroxypyrrolidinyl)-2-butenyl]-                                                 | 1 | 0.11 | 0.11 | 0.11 | / |
| Cucurbitacin b, 25-desacetoxy-                                                                               | 1 | 0.11 | 0.11 | 0.11 | / |
| 2,4,6-Cycloheptatrien-1-one, 3,5-bis-trimethylsilyl-                                                         | 1 | 0.09 | 0.09 | 0.09 | / |
| Z-(13,14-Epoxy)tetradec-11-en-1-ol acetate                                                                   | 1 | 0.09 | 0.09 | 0.09 | / |
| Oxiranedodecanoic acid, 3-octyl-, cis-                                                                       | 1 | 0.06 | 0.06 | 0.06 | / |

Note: the numbers are the frequency of occurrence of all the volatiles.

Fig S1. TIC of aroma for DHP samples with different roasting levels.

DHP-L

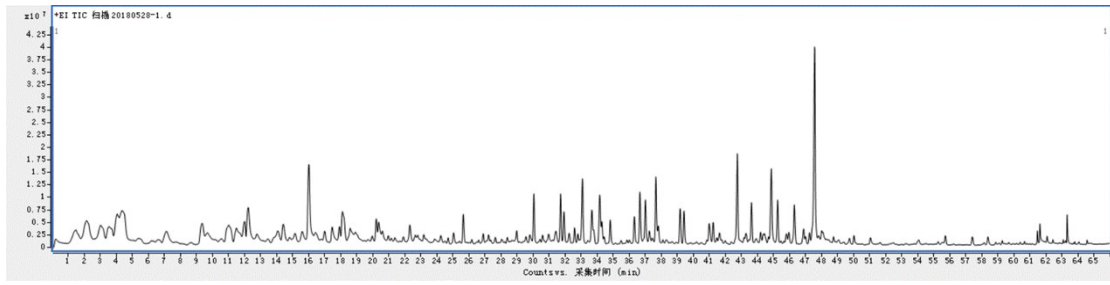

DHP-M

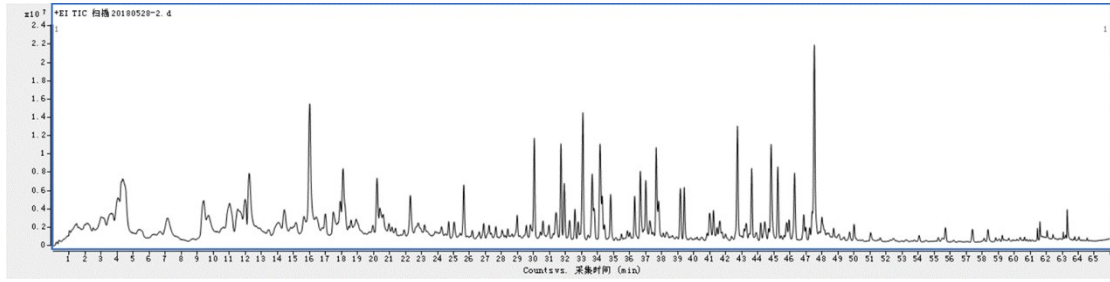

DHP-S

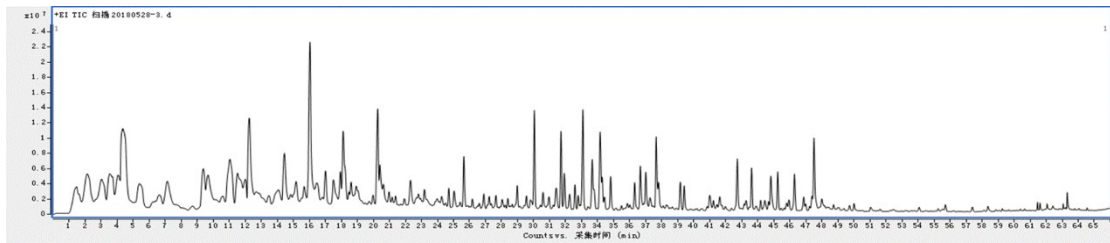

Supplement: RA-011-D0RA09703A-s001.pdf [file RA-011-D0RA09703A-s001.pdf]
